# Supplementary material for: A FEN 1-assisted swing arm DNA walker for electrochemical detection of ctDNA by target recycling cascade amplification
Source: Royal Society of Chemistry journal article supplement (doi:10.1039/d2ay00364c), 2022-01-01
Supplement: d2ay00364c1.pdf [file d2ay00364c1.pdf]

## Supporting Information For

### **FEN 1-assisted swing arm DNA walker for electrochemical detection of ctDNA by target recycling cascade amplification**

Dongmei Wang\*<sup>1a</sup>, Huan Zhou<sup>1a</sup>, Yundong Shi <sup>a</sup>, Wanjun Sun<sup>a</sup>

<sup>a</sup> School of Laboratory Medicine, Wannan Medical College, Wuhu, 241000, P. R. China.

\*corresponding author. Email: [20190009@wnmc.edu.cn](mailto:20190009@wnmc.edu.cn)

<sup>1</sup> These authors contributed equally to this work.

**Table S1** The sequences of these oligonucleotides in this work

| DNA                             | Sequence                                                            |
|---------------------------------|---------------------------------------------------------------------|
| ctDNA                           | 5'-CTACGCCATCAGCTCCA-3' (KARS G12D Mutation)                        |
| normal DNA (Nor)                | 5'-CTACGCCACCAGCTCCA-3' (KARS G12D Normal)                          |
| one base-mismatched DNA (M-1)   | 5'-CTATGCCACCAGCTCCA-3'                                             |
| one base-mismatched DNA (M-2)   | 5'-CTACGCCACGAGCTCCA-3'                                             |
| one base-mismatched DNA (M-3)   | 5'-CTACGCCACCAGCTCTA-3'                                             |
| Hairpin DNA (HP) <sup>[a]</sup> | 5'- <b>ATTACAGCTCCA</b> TTAGTCCGTCGTTGGAGCTGATGGCGTAG-3'            |
| Hairpin DNA (HP-1)              | 5'-ATTACAGCTCCCTTAGTCCGTCGTTGGAGCTGATGGCGTAG-3'                     |
| Capture DNA (CP) <sup>[a]</sup> | 5'-SH-C <sub>6</sub> -(T) <sub>n</sub> CCATCAGCTCCAACGACGGACTAAC-3' |
| MB-DNA (MB) <sup>[a]</sup>      | 5'-MB-CCGGGAGCTCCATCTGT <b>TGGAGCTGTAAT</b> -C <sub>6</sub> -SH-3'  |

[a] The bold parts of HP and MB represented the binding regions, similar like the italics parts of HP and CP.

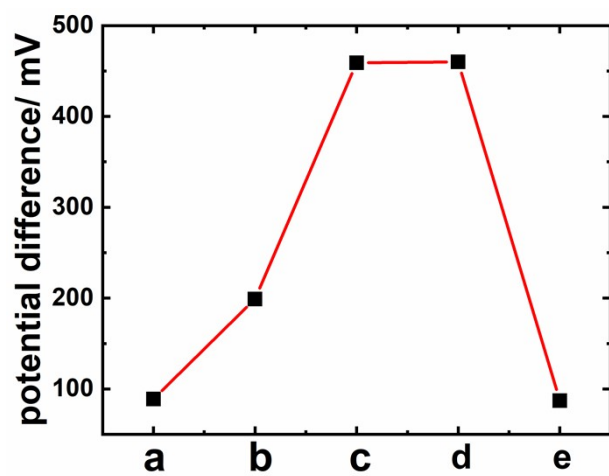

**Fig. S1** the peak-to-peak potential difference of modified electrodes in Figure 1A. (a) bare Au electrode, (b) CP+MB/Au, (c) MCH/CP+MB/Au, 2  $\mu\text{M}$  HP and 1  $\text{ng}/\mu\text{L}$  FEN 1 in the absence (d) and presence (e) of 10 pM ctDNA at 47°C for 2h

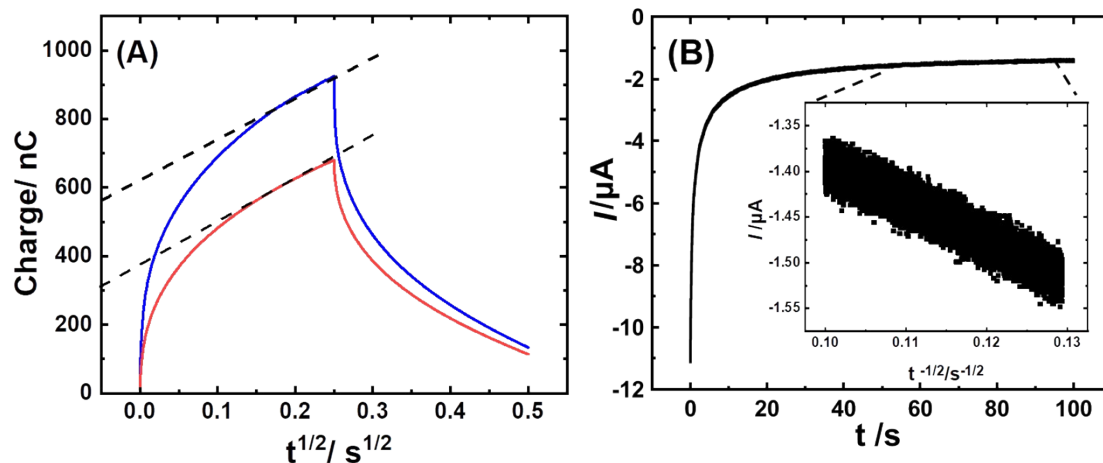

**Fig. S2** (A) CV curves at the MCH/Au electrode (red line) and MCH/MB/Au electrode (blue line) in 10 mM Tris-HCl buffer containing 50  $\mu\text{M}$   $\text{Ru}(\text{NH}_3)_6^{3+}$ ; (B)  $i$ - $t$  curve at the MCH/MB/Au electrode in 5 mM  $\text{Ru}(\text{NH}_3)_6^{3+}$  solution containing 0.1 M KCl, potentiostated at  $E = -0.2\text{V}$ , time step for current measurement: 0.001 s.

The packing density ( $\Gamma_{\text{DNA}}$ ) can be calculated according the following equations:

$$\Gamma_{\text{Ru}} = \frac{Q}{nFA}$$

$$\Gamma_{\text{DNA}} = \Gamma_{\text{Ru}} \frac{z}{m} N_A$$

$\Gamma_{\text{Ru}}$  is the quantity of the adsorbed  $\text{Ru}(\text{NH}_3)_6^{3+}$ ,  $n$  is the number of electrons involved in the redox reaction,  $F$  is Faraday's constant,  $A$  is the microscopic area of the electrode,  $z$  is the valence of the redox marker  $[\text{Ru}(\text{NH}_3)_6]^{3+}$ ,  $m$  is the number of bases in the DNA probes, and  $N_A$  is the Avogadro's constant.

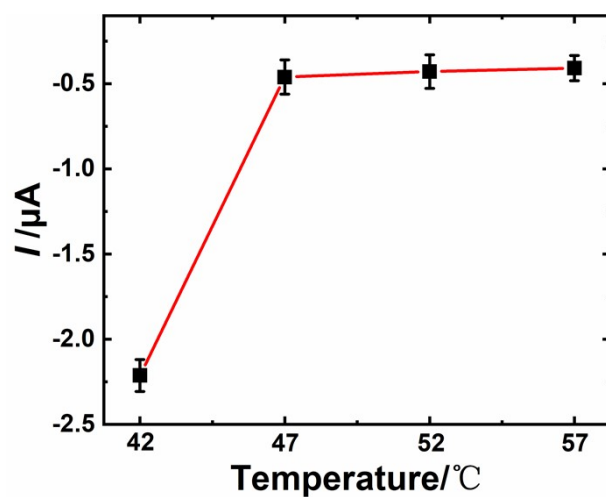

**Fig. S3** Effect of reaction temperature, the biosensors was incubated in 2  $\mu\text{M}$  HP and 1  $\text{ng}/\mu\text{L}$  FEN 1 in the presence of 10  $\text{pM}$  ctDNA for 2h.

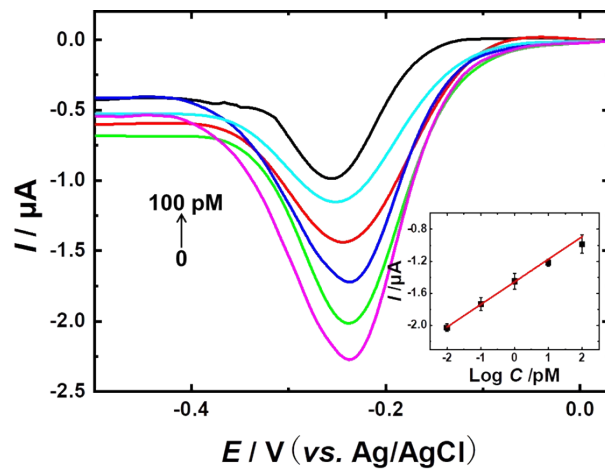

**Fig. S4** DPV responses of the biosensor to 0, 0.01, 0.1, 1, 10, 100 pM double-strand DNA, the inset was linear fit plot of peak current vs. logarithm of double-strand DNA concentration

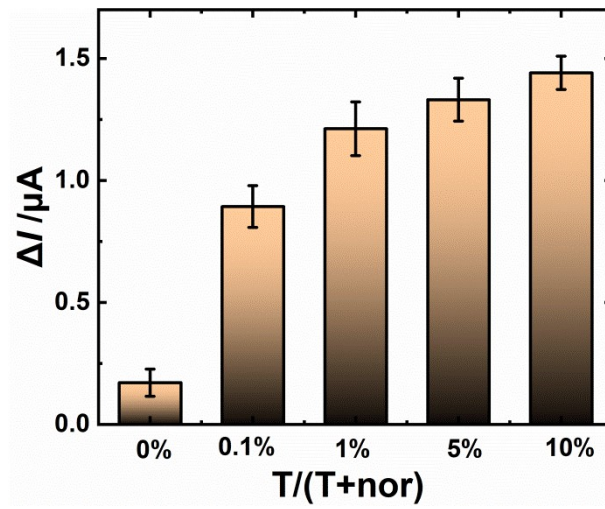

**Fig. S5.** Selectivity of the proposed biosensors.  $\Delta I$  of each sample containing T and nor with different proportions. Error bars represent standard deviations of three parallel experiments.

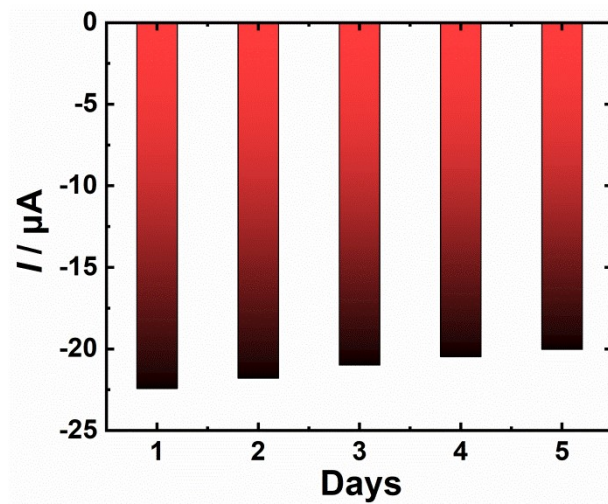

**Fig. S6** Stability of the proposed biosensor.



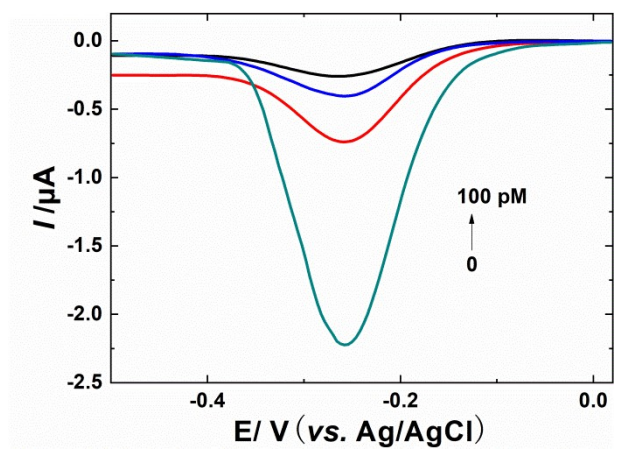

**Fig. S7** the DPV responses of the recovery assay of ctDNA in three ten-fold diluted serum samples with standard addition method.
